# Supplementary material for: Interferon-Induced Monocyte Immune Response Augments Immunotherapy and Correlates with Clinical Outcomes in Breast Cancer
Source: Research Square preprint supplement (doi:10.21203/rs.3.rs-3436350/v1), 2023-10-17
Supplement: Supplementary file 1 [file 11185f8f628bd3466d1c4180.xlsx]

## Sheet: Sheet1
number	status	time	CXCL10+Monocyte Score	density
1	1	80	7	high
2	1	59	6	high
3	1	13	3.33	low
4	1	70	7.33	high
5	1	22	3.33	low
6	1	16	4.33	low
7	1	17	4.33	low
8	1	28	2	low
9	1	60	5.33	high
10	1	19	3	low
11	1	27	3.33	low
12	1	26	2	low
13	1	69	6	high
14	1	17	4	low
15	1	26	3.33	low
16	0	83	9	high
17	0	132	7	high
18	0	129	8	high
19	0	119	6.33	high
20	0	107	6	high
21	0	82	3	low
22	0	106	7.33	high
23	0	105	6.33	high
24	0	104	3.33	low
25	0	82	7.33	high
26	0	76	4	low
