# Supplementary material for: Interferon-Induced Monocyte Immune Response Augments Immunotherapy and Correlates with Clinical Outcomes in Breast Cancer
Source: Research Square preprint supplement (doi:10.21203/rs.3.rs-3436350/v1), 2023-10-17
Supplement: Supplementary file 2 [file 227559c8c015bfedea708e24.xlsx]

## Sheet: Sheet1
	T1/2NOMO
number	doctor 1	doctor 2	doctor 3	average	SD
1	7	6	6	6.33333	0.471405
2	7	7	7	7	0
3	7	7	7	7	0
4	8	9	9	8.66667	0.471405
5	6	5	6	5.66667	0.471405
6	7	7	7	7	0
7	5	5	6	5.33333	0.471405
8	7	8	7	7.33333	0.471405
9	7	7	7	7	0
10	3	1	1	1.66667	0.942809
11	4	5	6	5	0.816497
12	1	1	1	1	0
13	8	8	9	8.33333	0.471405
14	5	6	6	5.66667	0.471405
15	8	8	9	8.33333	0.471405
16	5	6	4	5	0.816497
17	5	6	5	5.33333	0.471405
18	9	9	9	9	0
19	5	5	4	4.66667	0.471405
20	8	8	8	8	0
	T3/4N0/4MO
number	doctor 1	doctor 2	doctor 3	average	SD
1	5	5	6	5.33333	0.471405
2	3	2	3	2.66667	0.471405
3	7	7	7	7	0
4	7	8	8	7.66667	0.471405
5	5	5	5	5	0
6	8	8	8	8	0
7	3	2	2	2.33333	0.471405
8	1	2	2	1.66667	0.471405
9	3	3	3	3	0
10	1	1	1	1	0
11	1	1	1	1	0
12	1	1	1	1	0
13	2	2	2	2	0
14	5	5	5	5	0
15	5	4	5	4.66667	0.471405
16	4	6	5	5	0.816497
17	5	5	5	5	0
18	6	6	6	6	0
19	4	4	4	4	0
20	4	5	5	4.66667	0.471405
	T0/4N0/4M1
number	doctor 1	doctor 2	doctor 3	average	SD
1	4	5	6	5	0.816497
2	5	5	5	5	0
3	5	5	5	5	0
4	4	4	6	4.66667	0.942809
5	6	6	6	6	0
6	4	4	4	4	0
7	5	5	6	5.33333	0.471405
8	6	7	6	6.33333	0.471405
9	7	7	7	7	0
10	7	8	9	8	0.816497
11	5	5	6	5.33333	0.471405
12	1	1	1	1	0
13	1	2	2	1.66667	0.471405
14	3	3	3	3	0
15	1	1	1	1	0
16	1	1	1	1	0
17	2	3	3	2.66667	0.471405
18	2	2	2	2	0
19	2	2	2	2	0
20	2	2	2	2	0
	ⅢA
number	doctor 1	doctor 2	doctor 3	average	SD
1	7	7	7	7	0
2	6	6	6	6	0
3	3	4	3	3.33	0.471405
4	7	7	8	7.33	0.471405
5	3	3	4	3.33	0.471405
6	5	4	4	4.33	0.471405
7	4	5	5	4.33	0.471405
8	2	2	2	2	0
9	5	6	5	5.33	0.471405
10	3	3	3	3	0
11	4	3	3	3.33	0.471405
12	2	2	2	2	0
13	9	9	9	9	0
14	6	6	6	6	0
15	4	4	4	4	0
16	3	5	2	3.33	1.24722
17	7	7	7	7	0
18	8	8	8	8	0
19	6	7	6	6.33	0.471405
20	6	6	6	6	0
21	3	3	3	3	0
22	7	8	7	7.33	0.471405
23	6	7	6	6.33	0.471405
24	3	4	3	3.33	0.471405
25	7	8	7	7.33	0.471405
26	4	4	4	4	0
