# Supplementary material for: Interferon-Induced Monocyte Immune Response Augments Immunotherapy and Correlates with Clinical Outcomes in Breast Cancer
Source: Research Square preprint supplement (doi:10.21203/rs.3.rs-3436350/v1), 2023-10-17
Supplement: Supplementary file 3 [file f3e684e6d59e55b31e87ea91.xlsx]

## Sheet: Sheet1
number	性别	年龄	T	N	M	分级	TNM	TNM staging	Pathological classification	Tumor size (cm)	Number of metastatic lymph nodes in cancer	2019 supplementary follow-up survival (0 survival and 1 death)	Survival time of supplementary follow-up in 2019	CXCL10+Monocyte Score	density
1	女	50	T2	N2	M0	II	T2N2M0	IIIA	Invasive ductal carcinoma	3cm×3cm×1.5cm	3	1	80	7	high
2	女	55	T1	N2	M0	III	T1N2M0	IIIA	Invasive ductal carcinoma	1.5cm×1cm×1cm	4	1	59	6	high
3	女	51	T2	N2	M0	II~III	T2N2M0	IIIA	Invasive ductal carcinoma	3cm×2cm×1.5cm	3	1	13	3.33	low
4	女	43	T2	N1	M0	II	T2N1M0	IIIA	Invasive ductal carcinoma	3cm×2cm×1cm	1	1	70	7.33	high
5	女	56	T2	N2	M0	II~III	T2N2M0	IIIA	Invasive ductal carcinoma	4cm×3cm×1.5cm	2	1	22	3.33	low
6	女	48	T1	N2	M0	II~III	T1N2M0	IIIA	Invasive ductal carcinoma	2cm×2cm×1.8cm	6	1	16	4.33	low
7	女	31	T1	N2	M0	II	T1N2M0	IIIA	Invasive ductal carcinoma	1.4cm×1.3cm×0.8cm	9	1	17	4.33	low
8	女	58	T2	N2	M0	II~III	T2N2M0	IIIA	Invasive ductal carcinoma	3cm×3cm×2cm	9	1	28	2	low
9	女	67	T1	N2	M0	II~III	T1N2M0	IIIA	Invasive ductal carcinoma	1.2cm×1.2cm×1cm	8	1	60	5.33	high
10	女	37	T2	N2	M0	II~III	T2N2M0	IIIA	Invasive ductal carcinoma	3.5×3×2cm	5	1	19	3	low
11	女	56	T2	N2	M0	II~III	T2N2M0	IIIA	Invasive ductal carcinoma	3.5cm×3cm×2cm	4	1	27	3.33	low
12	女	46	T2	N2	M0	II	T2N2M0	IIIA	Invasive ductal carcinoma	3.5cm×3cm×2.5cm	8	1	26	2	low
13	女	60	T2	N2	M0	II	T2N2M0	IIIA	Invasive ductal carcinoma	3.5cm×2.5cm×3.0cm	9	1	69	6	high
14	女	54	T2	N2	M0	II	T2N2M0	IIIA	Invasive ductal carcinoma	3cm×2cm×1.3cm	6	1	17	4	low
15	女	67	T2	N2	M0	II~III	T2N2M0	IIIA	Invasive ductal carcinoma	2.5cm×2cm×1.3cm	6	1	26	3.33	low
16	女	53	T2	N2	M0	II	T2N2M0	IIIA	Invasive ductal carcinoma	4.5cm×4cm×3cm	4	0	83	9	high
17	女	60	T2	N2	M0	II	T2N2M0	IIIA	Invasive ductal carcinoma	3×2×2cm	8	0	132	7	high
18	女	57	T1	N2	M0	II	T1N2M0	IIIA	Invasive ductal carcinoma	1.5cm×1.5cm×1.5cm	5	0	129	8	high
19	女	53	T2	N2	M0	II	T2N2M0	IIIA	Invasive ductal carcinoma	2.5cm×2cm×2cm	4	0	119	6.33	high
20	女	55	T2	N2	M0	III	T2N2M0	IIIA	Invasive ductal carcinoma	3cm×2.5cm×2cm	4	0	107	6	high
21	女	84	T2	N2	M0	II	T2N2M0	IIIA	Invasive ductal carcinoma	3cm×3cm×3cm	5	0	82	3	low
22	女	59	T2	N2	M0	II	T2N2M0	IIIA	Invasive ductal carcinoma	2.5cm×2.0cm×2.0cm	2	0	106	7.33	high
23	女	38	T2	N2	M0	I	T2N2M0	IIIA	Invasive ductal carcinoma	3.0cm×2.5cm×1.0	7	0	105	6.33	high
24	女	38	T2	N2	M0	II	T2N2M0	IIIA	Invasive ductal carcinoma	3cm×2cm×1.4cm	4	0	104	3.33	low
25	女	36	T1	N2	M0	II	T1N2M0	IIIA	Invasive ductal carcinoma	1.2cm×1.2cm×1.2cm	4	0	82	7.33	high
26	女	44	T1	N2	M0	I~II	T1N2M0	IIIA	Invasive ductal carcinoma	1.8cm×1.5cm×1cm	4	0	76	4	low
